# Supplementary material
Source: publisher figshare collection journal article supplement (https://acs.figshare.com/ndownloader/files/5770965)
Supplement: Supplementary file 1 [file 5770965]

**“Elicitation – a new window into plant chemodiversity and phytochemical drug discovery”**

**Table 1.** List of additional elicitors screened for their ability to induce biochemical changes in plant roots.

| Compounds tested as elicitors     | Concentration in hydroponic solution |
|-----------------------------------|--------------------------------------|
| AgNO <sub>3</sub>                 | 40.0, 4.0, 0.4, 0.04, 0.02, 0.01 mM  |
| NiNO <sub>3</sub>                 | 0.5, 0.05, 0.005 mM                  |
| CuSO <sub>4</sub>                 | 1.0, 0.1, 0.01 mM                    |
| Pb(NO <sub>3</sub> ) <sub>2</sub> | 1.0, 0.1, 0.01 mM                    |
| Yeast extract                     | 1.0, 0.2, 0.04 g/L                   |
| Laminarin                         | 1.0, 0.1, 0.01 g/L                   |
| Sodium dodecyl sulfate            | 1.0, 0.1, 0.01 g/L                   |
| Jasmonic acid                     | 10.0, 1.0, 0.1, 0.01 mM              |
| Okadaic acid                      | 5.0, 1.0, 0.5 µM                     |
| Polygalacturonic acid             | 1.0, 0.2, 0.04 g/L                   |
| l-Phosphatidic acid               | 1.0, 0.2, 0.04, 0.008 mM             |
| PEG (avg. MW 3,350)               | 10.0, 1.0, 0.1 %                     |
| H <sub>2</sub> O <sub>2</sub>     | 0.5, 0.1, 0.01 M                     |
| Salicylic acid                    | 5.0, 0.5 mM                          |
| Calyculin                         | 6.0, 0.6, 0.06 µM                    |
| l-Amino butyrate                  | 10.0, 1.0, 0.1 mM                    |
| Eicosapentanoic acid              | 0.5, 0.1, 0.02 mM                    |
| Arachidonic acid                  | 10.0, 2.0, 0.2 mM                    |
| Glutathione                       | 100.0, 10.0, 1.0 mM                  |
| Ascorbic acid                     | 1.0, 0.1 g/L                         |
| NaF                               | 500.0, 50.0, 5.0 mM                  |

Plants from 3 species, *Glycyne max*, *Lupinus luteus*, and *Medicago sativa* were cultivated hydroponically as described in the experimental section and treated with these elicitors in the concentrations listed in the text. The efficiency of the elicitors was determined by their ability to induce flavonoid biosynthesis in the elicited plants, compared with non-elicited plants from the same species.

**“Elicitation – a new window into plant chemodiversity and phytochemical drug discovery”**

**Table 2.** Plant species\* with bioactivity (B=antibacterial, F=antifungal, C=anticancer), belonging to the families listed in Table 4 (abbreviations of elicitors are the same as in the article)

| Family/Species                    | Elicitor |          |      |      |      |
|-----------------------------------|----------|----------|------|------|------|
|                                   | Acetate  | Chitosan | MeJA | MeSA | n.e. |
| <b>Anacardiaceae</b>              |          |          |      |      |      |
| <i>Rhus integrifolia</i>          | B, C     | B        | B    | B    | B    |
| <i>Rhus ovata</i>                 | C        | B, C     | B, C | B    |      |
| <i>Rhus typhina</i>               | B, C     | B        | B    | B    | B    |
| <b>Apiaceae</b>                   |          |          |      |      |      |
| <i>Apium graveolens</i>           |          |          | B    |      |      |
| <i>Cryptotaenia japonica</i>      | B        |          |      |      | B, F |
| <i>Levisticum officinale</i>      |          |          | B    | B    | B    |
| <i>Petroselinum crispum</i>       | B, F     |          | F    |      |      |
| <i>Pimpinella anisum</i>          |          | B        |      |      |      |
| <b>Asteraceae</b>                 |          |          |      |      |      |
| <i>Anthemis nobilis</i>           | B, C     |          |      |      |      |
| <i>Bellis perennis</i>            | C        |          |      |      |      |
| <i>Calendula officinalis</i>      | C        |          |      |      |      |
| <i>Centaurea maculosa</i>         | B        |          |      |      |      |
| <i>Chrysanthemum coronarium</i>   | C, F     |          |      |      |      |
| <i>Chrysanthemum leucanthemum</i> | B        |          | B    |      |      |
| <i>Chrysanthemum parthenium</i>   | B, F, C  |          |      |      |      |
| <i>Cnicus benedictus</i>          | B        | B        |      | C    | B, C |
| <i>Eupatorium cannabinum</i>      | B, F     |          |      |      |      |
| <i>Eupatorium maculatum</i>       | B, F     | F        | F    | F    | F    |
| <i>Grindelia robusta</i>          |          |          |      |      | C    |
| <i>Lasthenia glabrata</i>         | B, C     | C        | B    |      | B    |
| <i>Layia platiglossa</i>          | C        |          |      |      |      |
| <i>Solidago virgaurea</i>         | B, F, C  |          |      |      |      |
| <b>Brassicaceae</b>               |          |          |      |      |      |
| <i>Barbarea verna</i>             | C        |          |      | B    |      |
| <i>Brassica hirta</i>             | B        |          | B    | B    | B    |
| <i>Brassica oleracea</i>          |          |          |      |      | B    |
| <i>Brassica rapa</i>              |          |          |      |      | F    |
| <i>Iberis intermedia</i>          | C        | C        | C    | C    | C    |
| <i>Isatis tinctoria</i>           | B        |          |      | B    | B    |
| <i>Nasturtium officinale</i>      | B        |          |      |      | B    |
| <b>Caryophyllaceae</b>            |          |          |      |      |      |
| <i>Dianthus barbatus</i>          |          |          |      |      | C    |
| <i>Gypsophila paniculata</i>      | C        |          |      | C    | C    |
| <i>Lychnis alba</i>               | B        |          |      | B, F | B    |
| <i>Lychnis chalcidonica</i>       | C, F     |          | F    | C, F | F    |

## Supporting Information

**“Elicitation – a new window into plant chemodiversity and phytochemical drug discovery”**

Table 2 continued.

| Family/Species                  | Elicitor |          |         |      |      |
|---------------------------------|----------|----------|---------|------|------|
|                                 | Acetate  | Chitosan | MeJA    | MeSA | n.e. |
| <i>Cucurbitaceae</i>            |          |          |         |      |      |
| <i>Citrullus colorynthis</i>    | C        | C        | C       | B, C | C    |
| <i>Cucumis sativus</i>          | B, C     | C        | C       | C    | C    |
| <i>Lagenaria siceraria</i>      | C        | C        | C       | C    | C    |
| <i>Momordica charantia</i>      | C        |          |         |      |      |
| <i>Fabaceae</i>                 |          |          |         |      |      |
| <i>Acacia saligna</i>           |          | B        |         |      |      |
| <i>Albizia julibrissin</i>      | C, F     | B, C, F  | B, C, F | C, F | C, F |
| <i>Albizia kolomikta</i>        | B        | F        |         |      | B    |
| <i>Erythrina corallodendron</i> | B        | F        |         | F    |      |
| <i>Glycyrrhiza echinata</i>     | C        |          |         |      |      |
| <i>Gymnocladus dioicus</i>      | B, C     | C        | F       |      |      |
| <i>Indigofera suffruticosa</i>  |          | B        |         |      |      |
| <i>Laburnum anagyroides</i>     | B        | B        | B       | B    | B    |
| <i>Lupinus arboreus</i>         |          |          | F       |      |      |
| <i>Ononis spinosa</i>           | B        | B        |         |      |      |
| <i>Pachyrhizus erosus</i>       | B, C     |          |         |      |      |
| <i>Petalostemon candidum</i>    | B        | B        | B       | B    | B    |
| <i>Pueraria lobata</i>          | B        |          |         |      |      |
| <i>Lamiaceae</i>                |          |          |         |      |      |
| <i>Dracocephalum moldavica</i>  | C        |          |         |      |      |
| <i>Leonurus cardiaca</i>        | B        |          |         |      |      |
| <i>Lycopus europaeus</i>        | C        |          |         | C    |      |
| <i>Marrubium vulgare</i>        | C        | B        | B       |      |      |
| <i>Monarda citriodora</i>       | F        | F        |         | F    | F    |
| <i>Pogostemon patchouli</i>     | B        |          |         |      |      |
| <i>Salvia apiana</i>            |          | C        |         |      |      |
| <i>Schizonepeta tenuifolia</i>  | B        |          |         |      |      |
| <i>Scutellaria orientalis</i>   |          |          |         | C    |      |
| <i>Thymus vulgaris</i>          |          | B, F     |         |      |      |
| <i>Polemoniaceae</i>            |          |          |         |      |      |
| <i>Gilia capitata</i>           |          | B        | B       |      |      |
| <i>Linanthus grandiflorus</i>   | C        | C        | C       | C    | C    |
| <i>Polemonium caeruleum</i>     | F        | F        | F       | F    | F    |

\* The cultivation of all plant species tested was initiated from seeds, purchased from commercial vendors as Chiltern Seeds, Ulverston, England; Richters Herbs, Ontario, Canada; B & T World Seeds, Olonzac, France.

As seen from this table, most non-elicited plants from *Cucurbitaceae*, showed anti-cancer activity. This was expected because plants from this family synthesize cucurbitacins, most of which are cytotoxic. Also, root extracts from non-elicited *Juglans regia* (walnut), that constitutively synthesize cytotoxic naphthoquinones, showed activity in the anti-

**“Elicitation – a new window into plant chemodiversity and phytochemical drug  
discovery”**

cancer screens. These plants can be regarded as positive controls for the anti-cancer assays. To the contrary, many species of genera such as *Scabiosa*, *Pachyrhizus*, *Phacelia*, which have no reported cytotoxic activities, showed no anti-cancer activity in our screens, and, thus, can be regarded as negative controls.
